# Supplementary material for: Insights into Campylobacter jejuni colonization and enteritis using a novel infant rabbit model
Source: PubMed Central journal article supplement (PMC4928045; doi:10.1038/srep28737), 2016-06-30
Supplement: srep28737-s1.pdf [file srep28737-s1.pdf]

# Insights into *Campylobacter jejuni* colonization and enteritis using a novel infant rabbit model

Yuwei Shang<sup>1,\*</sup>, Fangzhe Ren<sup>1,\*</sup>, Zhaojun Song<sup>1</sup>, Qiuchun Li<sup>1</sup>, Xiaohui Zhou<sup>2</sup>, Xiaobo Wang<sup>3</sup>, Zhonglan Xu<sup>4</sup>, Guangyu Bao<sup>5</sup>, Ting Wan<sup>1</sup>, Tianyao Lei<sup>1</sup>, Nan Wang<sup>1</sup>, Xin-an Jiao<sup>1</sup>, Jinlin Huang<sup>1</sup>

<sup>1</sup> Jiangsu Key Lab of Zoonosis, Jiangsu Co-Innovation Center for Prevention and Control of Important Animal Infectious Diseases and Zoonoses, Yangzhou University, Yangzhou 225009, China. <sup>2</sup> Department of Pathobiology and Veterinary Science, the University of Connecticut, Storrs 06269, United States of America. <sup>3</sup> College of Veterinary Medicine, Yangzhou University, Yangzhou 225009, China. <sup>4</sup> Yangzhou Maternity and Infant Hospital, Yangzhou 225001, China. <sup>5</sup> Yangzhou First People's Hospital, Yangzhou 225004, China. \* These authors contributed equally to this work. Correspondence and requests for materials should be addressed to J.H. ( email: [jinlin@yzu.edu.cn](mailto:jinlin@yzu.edu.cn) )

## Supplementary Table 1. Characteristics of plasmids and primers in SCOTS study

| plasmids or primers | Characteristics and/or sequences                                                 | Source/reference |
|---------------------|----------------------------------------------------------------------------------|------------------|
| Plasmid             |                                                                                  |                  |
| pMD20-T             | Cloning vector, Amp <sup>R</sup>                                                 | TAKARA           |
| pMDCJ16S            | pMD20-T containing the 16SrRNA gene sequence (1466 bp) of <i>C. jejuni</i> 11168 | This work        |
| pMDCJ23S            | pMD20-T containing the 23SrRNA gene sequence (2724 bp) of <i>C. jejuni</i> 11168 | This work        |
| Primers             |                                                                                  |                  |
| SCOTS-N6-01         | 5'-GCCGGTCGACTGCAGAATTC-N6-3'                                                    | [1]              |
| SCOTS-N6-02         | 5'-CTACGCATGCTCGAGGTACC-N6-3'                                                    | [1]              |
| SCOTS-01            | 5'-GCCGGTCGACTGCAGAATTC-3'                                                       | [1]              |
| SCOTS-02            | 5'-CTACGCATGCTCGAGGTACC-3'                                                       | [1]              |
| 16srrn-F            | 5'-GGATCCCTGGCTCAGAGTGAACGC-3'                                                   | This work        |
| 16srrn-R            | 5'-GGTACCTACGGTTACCTTGTACGAC-3'                                                  | This work        |
| 23srrn-F            | 5'-GAATTCCGAATGGTGGATGCCTTGA-3'                                                  | This work        |

|           |                                                                       |           |
|-----------|-----------------------------------------------------------------------|-----------|
| 23ssrn-R  | 5'-GGTACCACGCTGCGATGCTCTTGG-3'                                        | This work |
| cj0402-F  | 5'-CGATGGAACGGATAATCACC-3' amplifies <i>cj0402</i> gene for qRT-PCR   | [2]       |
| cj0402-R  | 5'-AATACCTGCATTTCCAAGAGC-3'                                           | [3]       |
| pnp-F     | 5'-TACCTCTAACCGTCCAA-3' amplifies <i>pnp</i> gene for qRT-PCR         | This work |
| pnp-R     | 5'-ATCAATAATGCGTGCTG-3'                                               | This work |
| katA-F    | 5'-AAGGCGAAGTTACTCCA-3' amplifies <i>katA</i> gene for qRT-PCR        | This work |
| katA-R    | 5'-TTCCTACCAAGTCCCAG-3'                                               | This work |
| cj0609c-F | 5'-TTTCTTTCCGCGTGTGTCATA-3' amplifies <i>cj0609c</i> gene for qRT-PCR | This work |
| cj0609c-R | 5'-TTATGTCCAGCATTAGCAG-3'                                             | This work |
| cj1481c-F | 5'-CCATATCTGCATCGCTA-3' amplifies <i>cj1481c</i> gene for qRT-PCR     | This work |
| cj1481c-R | 5'-TTGTGCGTATTGTGGAGTC-3'                                             | This work |
| acs-F     | 5'-AGTCATTGTTTGCTTTTGTGG-3' amplifies <i>acs</i> gene for qRT-PCR     | This work |
| acs-R     | 5'-GATTTCTTCGCCTCTTGCT-3'                                             | This work |

## References

1. Li, W., Liu, L., Chen, H. & Zhou, R. Identification of *Streptococcus suis* genes preferentially expressed under iron starvation by selective capture of transcribed sequences. *FEMS Microbiol. Lett.* **292**, 123-133 (2009).
2. Malik-Kale, P., Parker, C. T. & Konkel, M. E. Culture of *Campylobacter jejuni* with sodium deoxycholate induces virulence gene expression. *J Bacteriol.* **190** 2286-2297 (2008).
3. Schlech, W. F. 3rd, Chase, D. P. & Badley, A. A model of food-borne *Listeria monocytogenes* infection in the Sprague-Dawley rat using gastric inoculation: development and effect of gastric acidity on infective dose. *Int. J. Food Microbiol.* **18**, 15-24 (1993).

**Supplementary Table 2. primers used for C.jejuni mutant construction**

| Primers                 | Sequence <sup>a</sup>                                                 | Source    |
|-------------------------|-----------------------------------------------------------------------|-----------|
| cj1385-F                | 5'- <u>CGCGGATCCT</u> GACTAACGATTTTGGG -3' ( <i>Bam</i> H I )         | This work |
| cj1385-R                | 5'- CGCGAGCTCGTCTTCTTTGGGCTAT -3' ( <i>Sac</i> I )                    | This work |
| acs-F                   | 5'- <u>CGCGGATCCT</u> TTTCTCGTAATGCTCGTA -3' ( <i>Bam</i> H I )       | This work |
| acs-R                   | 5- <u>CGCGAGCTC</u> ATTCTTATGGCAGTTGG -3' ( <i>Sac</i> I )            | This work |
| cj0259-F                | 5'- <u>CGCGGATCC</u> GGCATGAAAAGGCAAAA -3'( <i>Bam</i> H I )          | This work |
| cj0259-R                | 5'- <u>CGCGAGCTC</u> CACAACCGCAACTCT -3' ( <i>Sac</i> I )             | This work |
| kan( <i>Hind</i> III)-F | 5'- <u>CCCAAGCTT</u> CGCTTATCAATATATCTATAGAATG -3' ( <i>Hind</i> III) | This work |
| kan( <i>Hind</i> III)-R | 5'- <u>CCCAAGCTT</u> GATAATGCTAAGACAATCACTAAA -3' ( <i>Hind</i> III)  | This work |
| kan( <i>Bgl</i> II)-F   | 5'- <u>GGAAGATCT</u> CGCTTATCAATATATCTATAGAATG -3' ( <i>Bgl</i> II)   | This work |
| kan( <i>Bgl</i> II)-R   | 5'- <u>GGAAGATCT</u> GATAATGCTAAGACAATCACTAAA -3' ( <i>Bgl</i> II)    | This work |

<sup>a</sup> Restriction sites are underlined in the primer sequence.
